# Supplementary material
Source: Springer Nature journal article supplement (https://www.springermedizin.de/resource/supplementary/12936_2010_1388_MOESM4_ESM.pdf/9549678)

## Transmission zones

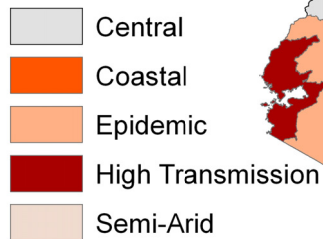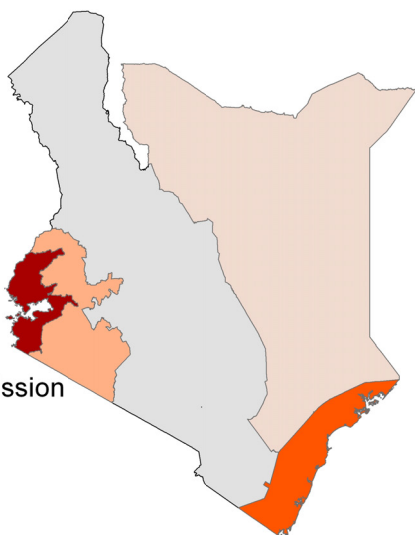

## Provinces

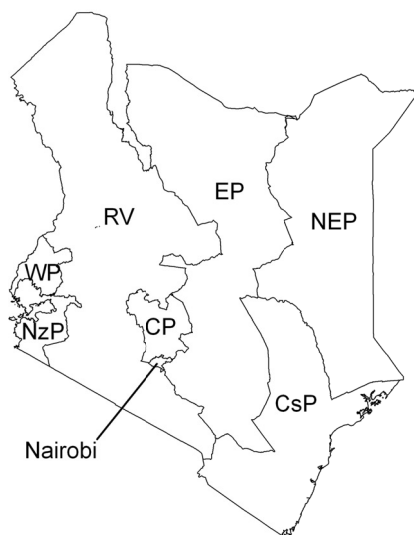

## Survey date

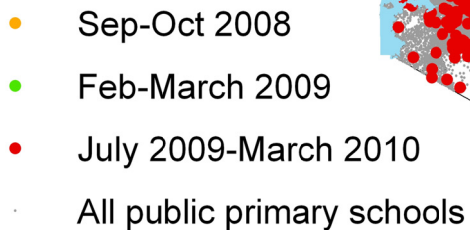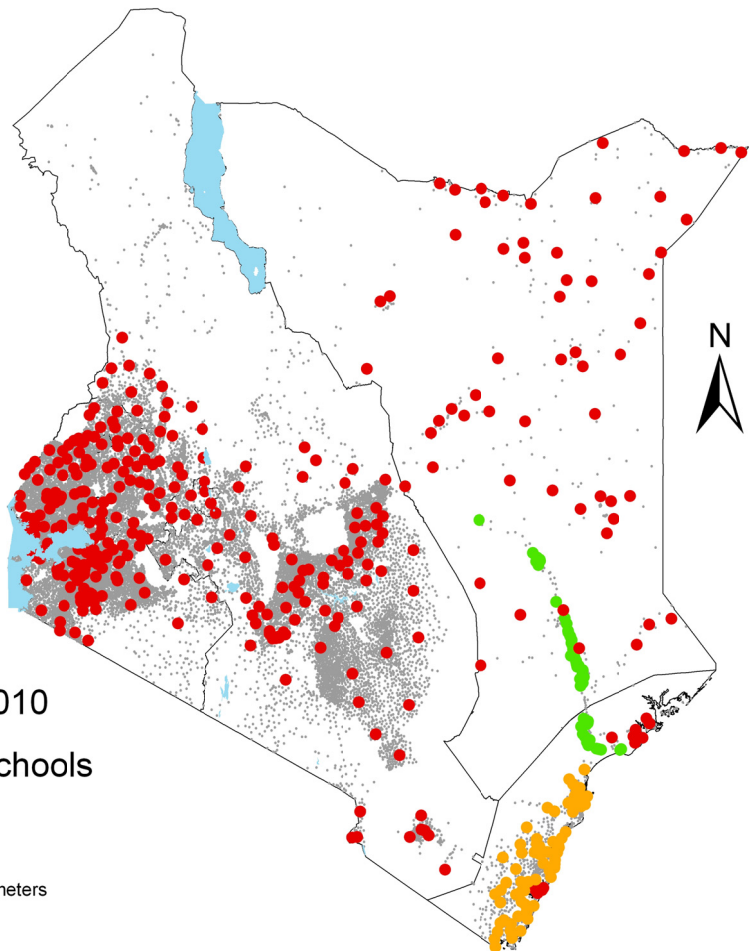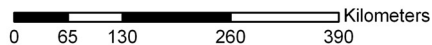

Supplement: MOESM4 [file 9549678]
